# Supplementary material for: A sub-cubic time algorithm for computing the quartet distance between two general trees
Source: Springer Nature journal article supplement (doi:10.1186/1748-7188-6-15), 2011-06-03
Supplement: 13015_2011_130_MOESM3_ESM.pdf [file 13015_2011_130_MOESM3_ESM.pdf]

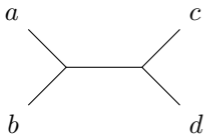

Butterfly  $ab|cd$

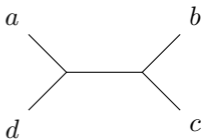

Butterfly  $ad|bc$

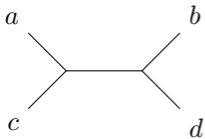

Butterfly  $ac|bd$

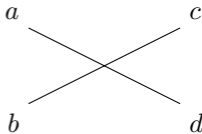

Star
