# Supplementary material for: A sub-cubic time algorithm for computing the quartet distance between two general trees
Source: Springer Nature journal article supplement (doi:10.1186/1748-7188-6-15), 2011-06-03

Number of leaves versus execution time

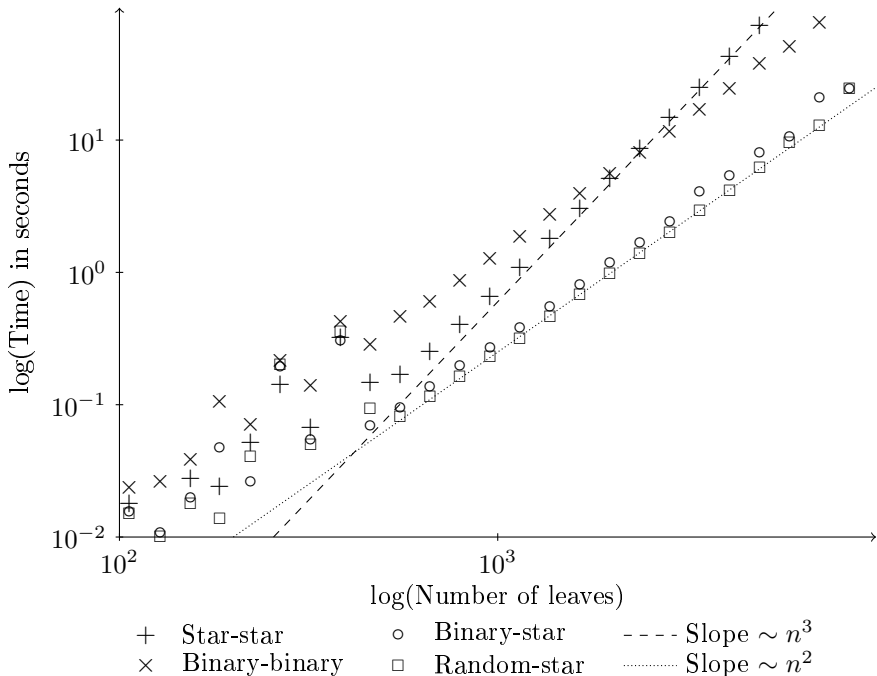

Supplement: 13015_2011_130_MOESM11_ESM.pdf [file 13015_2011_130_MOESM11_ESM.pdf]
